# Supplementary material for: The Impact of Total Tumor Diameter on Lymph Node Metastasis and Tumor Recurrence in Papillary Thyroid Carcinomas
Source: MDPI journal article supplement (doi:10.3390/diagnostics14030272), 2024-01-26
Supplement: s1 [file s1]

**Supplemental Table S1.** Comparisons of clinicopathological features by “tumor focality” in all papillary thyroid carcinomas and papillary microcarcinomas.

|                                   |           | <i>In all papillary thyroid carcinomas</i><br><i>n: 706</i> |                                    |              |                  | <i>In papillary microcarcinomas</i><br><i>n: 406</i> |                                    |              |                  |
|-----------------------------------|-----------|-------------------------------------------------------------|------------------------------------|--------------|------------------|------------------------------------------------------|------------------------------------|--------------|------------------|
| <i>Variables</i>                  |           | <b>Unifocal</b><br><b>n: 340</b>                            | <b>Multifocal</b><br><b>n: 366</b> | <b>Total</b> | <b>p</b>         | <b>Unifocal</b><br><b>n: 219</b>                     | <b>Multifocal</b><br><b>n: 187</b> | <b>Total</b> | <b>p</b>         |
|                                   |           | <b>n (%)</b>                                                | <b>n (%)</b>                       | <b>n</b>     |                  | <b>n (%)</b>                                         | <b>n (%)</b>                       | <b>n</b>     |                  |
| <b>Age</b>                        | ≤45 years | 128 (54.5)                                                  | 107 (45.5)                         | 235          | <b>0.018</b>     | 75 (61.0)                                            | 48 (39.0)                          | 123          | 0.061            |
|                                   | >45 years | 212 (45.0)                                                  | 259 (55.0)                         | 471          |                  | 144 (50.9)                                           | 139 (49.1)                         | 283          |                  |
| <b>Gender</b>                     | Female    | 289 (49.1)                                                  | 300 (50.9)                         | 589          | 0.279            | 195 (55.6)                                           | 156 (44.4)                         | 351          | 0.067            |
|                                   | Male      | 51 (43.6)                                                   | 66 (56.4)                          | 117          |                  | 24 (43.6)                                            | 31 (56.4)                          | 55           |                  |
| <b>Lymphocytic thyroiditis</b>    | Absent    | 207 (50.5)                                                  | 204 (49.5)                         | 411          | 0.176            | 129 (56.6)                                           | 99 (43.4)                          | 228          | 0.243            |
|                                   | Present   | 133 (45.1)                                                  | 162 (54.9)                         | 295          |                  | 90 (50.6)                                            | 88 (49.4)                          | 178          |                  |
| <b>Primary tumor diameter</b>     | ≤10 mm    | 219 (53.9)                                                  | 187 (46.1)                         | 406          | <b>&lt;0.001</b> | 219 (53.9)                                           | 187 (46.1)                         | 406          | *                |
|                                   | >10 mm    | 121 (40.3)                                                  | 179 (59.7)                         | 300          |                  |                                                      |                                    |              |                  |
| <b>Histological subtype</b>       | CPTC      | 160 (46.2)                                                  | 186 (53.8)                         | 346          | 0.065            | 113 (53.8)                                           | 97 (46.2)                          | 210          | 0.971            |
|                                   | IFPTC     | 173 (51.5)                                                  | 163 (48.5)                         | 336          |                  | 102 (54.3)                                           | 86 (45.7)                          | 188          |                  |
|                                   | ASPTC     | 7 (29.2)                                                    | 17 (70.8)                          | 24           |                  | 4 (50.0)                                             | 4 (50.0)                           | 8            |                  |
| <b>LVI</b>                        | Absent    | 311 (48.7)                                                  | 328 (51.3)                         | 639          | 0.401            | 216 (55.0)                                           | 177 (45.0)                         | 393          | <b>0.023</b>     |
|                                   | Present   | 29 (43.3)                                                   | 38 (56.7)                          | 67           |                  | 3 (23.1)                                             | 10 (76.9)                          | 13           |                  |
| <b>PNI</b>                        | Absent    | 333 (48.0)                                                  | 360 (52.0)                         | 693          | 0.893            | 218 (54.1)                                           | 185 (45.9)                         | 403          | 0.441            |
|                                   | Present   | 7 (53.8)                                                    | 6 (46.2)                           | 13           |                  | 1 (33.3)                                             | 2 (66.7)                           | 3            |                  |
| <b>LNM</b>                        | Absent    | 169 (46.7)                                                  | 193 (53.3)                         | 362          | 0.291            | 110 (52.4)                                           | 100 (47.6)                         | 210          | 0.081            |
|                                   | Present   | 29 (40.3)                                                   | 43 (59.7)                          | 72           |                  | 9 (34.7)                                             | 17 (65.3)                          | 26           |                  |
| <b>ETE</b>                        | Absent    | 277 (48.9)                                                  | 289 (51.1)                         | 566          | 0.404            | 201 (56.3)                                           | 156 (43.7)                         | 357          | <b>0.008</b>     |
|                                   | Present   | 63 (45.0)                                                   | 77 (55.0)                          | 140          |                  | 18 (36.7)                                            | 31 (63.3)                          | 49           |                  |
| <b>Radioactive iodine therapy</b> | Absent    | 193 (59.2)                                                  | 133 (40.8)                         | 326          | <b>&lt;0.001</b> | 189 (59.2)                                           | 130 (40.8)                         | 319          | <b>&lt;0.001</b> |
|                                   | Present   | 147 (38.7)                                                  | 233 (61.3)                         | 380          |                  | 30 (34.5)                                            | 57 (65.5)                          | 87           |                  |
| <b>Recurrence</b>                 | Absent    | 336 (48.6)                                                  | 355 (51.4)                         | 691          | 0.155            | 218 (54.1)                                           | 185 (45.9)                         | 403          | 0.441            |
|                                   | Present   | 7 (31.8)                                                    | 15 (68.2)                          | 22           |                  | 3 (42.9)                                             | 4 (57.1)                           | 7            |                  |
| <b>BRAFV600E</b>                  | Wild-type | 167 (46.1)                                                  | 195 (53.9)                         | 362          | 0.448            | 119 (54.6)                                           | 99 (45.4)                          | 218          | 0.994            |
|                                   | Mutated   | 47 (50.5)                                                   | 46 (49.5)                          | 93           |                  | 23 (56.1)                                            | 18 (43.9)                          | 41           |                  |

**CPTC**: : Classic papillary thyroid carcinoma, **IFPTC**: Infiltrative follicular subtype papillary thyroid carcinoma, **ASPTC**: Aggressive subtype papillary thyroid carcinoma, **LVI**: Lymphovascular invasion, **PNI**: Perineural invasion, **LNM**: Lymph node metastasis, **ETE**: Extrathyroidal extension.

**Supplemental Table S2 . Comparisons of clinicopathological features by “number of tumor foci”**

*In whole study group.*

| Variables                     |           | Number of tumor foci according to<br>4-tiered system<br>n: 706 |            |           |           | p      | Number of tumor foci according to<br>3-tiered sytem<br>n: 706 |            |            |        | p |
|-------------------------------|-----------|----------------------------------------------------------------|------------|-----------|-----------|--------|---------------------------------------------------------------|------------|------------|--------|---|
|                               |           | 1                                                              | 2          | 3         | 4+        |        | 1                                                             | 2          | 3+         |        |   |
|                               |           | n (%)                                                          | n (%)      | n (%)     | n (%)     |        | n (%)                                                         | n (%)      | n (%)      |        |   |
| Age                           | ≤45 years | 129 (54.9)                                                     | 58 (24.7)  | 18 (7.7)  | 30 (12.8) | 0.049  | 129 (54.9)                                                    | 58 (24.7)  | 48 (20.4)  | 0.031  |   |
|                               | >45 years | 213 (45.2)                                                     | 125 (26.5) | 61 (13.0) | 72 (15.3) |        | 213 (45.2)                                                    | 125 (26.5) | 133 (28.2) |        |   |
| Gender                        | Female    | 291 (49.4)                                                     | 145 (24.6) | 66 (11.2) | 87 (14.8) | 0.352  | 291 (49.4)                                                    | 145 (24.6) | 153 (26.0) | 0.206  |   |
|                               | Male      | 51 (43.6)                                                      | 38 (32.5)  | 13 (11.1) | 15 (12.8) |        | 51 (43.6)                                                     | 38 (32.5)  | 28 (23.9)  |        |   |
| Lymphocytic<br>thyroiditis    | Absent    | 209 (50.7)                                                     | 108 (26.3) | 41 (10.0) | 53 (12.9) | 0.254  | 209 (50.7)                                                    | 108 (26.3) | 94 (22.9)  | 0.131  |   |
|                               | Present   | 133 (45.1)                                                     | 75 (25.4)  | 38 (12.9) | 49 (16.6) |        | 133 (45.1)                                                    | 75 (25.4)  | 87 (29.5)  |        |   |
| Primary tumor<br>diameter     | ≤10 mm    | 219 (35.9)                                                     | 104 (25.6) | 42 (10.3) | 41 (10.1) | <0.001 | 219 (35.9)                                                    | 104 (25.6) | 83 (20.4)  | <0.001 |   |
|                               | >10 mm    | 123 (41.0)                                                     | 79 (26.3)  | 37 (12.3) | 61 (20.3) |        | 123 (41.0)                                                    | 79 (26.3)  | 98 (32.7)  |        |   |
| Histological<br>subtype       | CPTC      | 162 (46.8)                                                     | 80 (23.1)  | 38 (11.0) | 66 (19.1) | <0.001 | 162 (46.8)                                                    | 80 (23.1)  | 104 (30.1) | 0.006  |   |
|                               | IFPTC     | 173 (51.5)                                                     | 91 (27.1)  | 41 (12.2) | 31 (9.2)  |        | 173 (51.5)                                                    | 91 (27.1)  | 72 (21.4)  |        |   |
|                               | ASPTC     | 7 (29.2)                                                       | 12 (50.0)  | 0 (0.0)   | 5 (20.8)  |        | 7 (29.2)                                                      | 12 (50.0)  | 5 (20.8)   |        |   |
| LVI                           | Absent    | 313 (49.0)                                                     | 166 (26.0) | 73 (11.4) | 87 (13.6) | 0.264  | 313 (49.0)                                                    | 166 (26.0) | 160 (25.0) | 0.508  |   |
|                               | Present   | 29 (43.3)                                                      | 17 (25.4)  | 6 (9.0)   | 15 (22.4) |        | 29 (43.3)                                                     | 17 (25.4)  | 21 (31.3)  |        |   |
| PNI                           | Absent    | 335 (48.3)                                                     | 181 (26.1) | 78 (11.3) | 99 (14.3) | 0.688  | 335 (48.3)                                                    | 181 (26.1) | 177 (25.5) | 0.676  |   |
|                               | Present   | 7 (53.8)                                                       | 2 (15.4)   | 1 (7.7)   | 3 (23.1)  |        | 7 (53.8)                                                      | 2 (15.4)   | 4 (30.8)   |        |   |
| LNM                           | Absent    | 170 (47.0)                                                     | 88 (24.3)  | 42 (11.6) | 62 (17.1) | 0.658  | 170 (47.0)                                                    | 88 (24.3)  | 104 (28.7) | 0.498  |   |
|                               | Present   | 29 (40.3)                                                      | 23 (32.0)  | 7 (9.7)   | 13 (18.0) |        | 29 (40.3)                                                     | 23 (32.0)  | 20 (27.7)  |        |   |
| ETE                           | Absent    | 279 (49.3)                                                     | 145 (25.6) | 64 (11.3) | 78 (13.8) | 0.696  | 279 (49.3)                                                    | 145 (25.6) | 142 (25.1) | 0.649  |   |
|                               | Present   | 63 (45.0)                                                      | 38 (27.1)  | 15 (10.7) | 24 (17.1) |        | 63 (45.0)                                                     | 38 (27.1)  | 39 (27.9)  |        |   |
| Radioactive<br>iodine therapy | Absent    | 193 (59.2)                                                     | 81 (24.8)  | 29 (8.9)  | 23 (7.1)  | <0.001 | 193 (59.2)                                                    | 81 (24.8)  | 52 (16.0)  | <0.001 |   |
|                               | Present   | 149 (39.2)                                                     | 102 (26.8) | 50 (13.2) | 79 (20.8) |        | 149 (39.2)                                                    | 102 (26.8) | 129 (33.9) |        |   |
| Recurrence                    | Absent    | 338 (48.9)                                                     | 177 (25.6) | 78 (11.3) | 98 (14.2) | 0.209  | 338 (48.9)                                                    | 177 (25.6) | 176 (25.5) | 0.220  |   |
|                               | Present   | 7 (31.8)                                                       | 8 (36.4)   | 2 (9.1)   | 5 (22.7)  |        | 7 (31.8)                                                      | 8 (36.4)   | 7 (31.8)   |        |   |
| BRAFV600E                     | Wild-type | 167 (46.1)                                                     | 97 (26.8)  | 42 (11.6) | 56 (15.5) | 0.685  | 167 (46.1)                                                    | 97 (26.8)  | 98 (27.1)  | 0.528  |   |
|                               | Mutated   | 48 (51.6)                                                      | 20 (21.5)  | 12 (12.9) | 13 (14.0) |        | 48 (51.6)                                                     | 20 (21.5)  | 25 (26.9)  |        |   |

**CPTC:** : Classic papillary thyroid carcinoma, **IFPTC:** Infiltrative follicular subtype papillary thyroid carcinoma, **ASPTC:** Aggressive subtype papillary thyroid carcinoma, **TTD:** Total tumor diameter, **LVI:** Lymphovascular invasion, **PNI:** Perineural invasion, **LNМ:** Lymph node metastasis, **ETE:** Extrathyroidal extension.

**Supplemental Table S3.** Comparisons of clinicopathological features by tumor laterality and focality in papillary thyroid carcinomas and papillary microcarcinomas with total thyroidectomy.

|                            |           | In whole study group<br>with total thyroidectomy<br>n: 668 |                                    |                                   |            |        | In papillary microcarcinomas<br>with total thyroidectomy<br>n: 372 |                                    |                                   |            |       |
|----------------------------|-----------|------------------------------------------------------------|------------------------------------|-----------------------------------|------------|--------|--------------------------------------------------------------------|------------------------------------|-----------------------------------|------------|-------|
| Variables                  |           | Unilateral/<br>Unifocal<br>n (%)                           | Unilateral/<br>Multifocal<br>n (%) | Bilateral/<br>Multifocal<br>n (%) | Total<br>n | p      | Unilateral/<br>Unifocal<br>n (%)                                   | Unilateral/<br>Multifocal<br>n (%) | Bilateral/<br>Multifocal<br>n (%) | Total<br>n | p     |
| Age                        | ≤45 years | 117 (52.2)                                                 | 38 (17.0)                          | 69 (30.8)                         | 224        | 0.072  | 66 (57.9)                                                          | 21 (18.4)                          | 27 (23.7)                         | 114        | 0.217 |
|                            | >45 years | 191 (43.0)                                                 | 96 (21.6)                          | 157 (35.4)                        | 444        |        | 124 (48.1)                                                         | 59 (22.9)                          | 75 (29.1)                         | 258        |       |
| Gender                     | Female    | 261 (46.9)                                                 | 107 (19.2)                         | 188 (33.8)                        | 556        | 0.449  | 169 (52.6)                                                         | 64 (19.9)                          | 88 (27.4)                         | 321        | 0.149 |
|                            | Male      | 47 (42.0)                                                  | 27 (24.1)                          | 38 (33.9)                         | 112        |        | 21 (41.2)                                                          | 16 (31.4)                          | 14 (27.5)                         | 51         |       |
| Lymphocytic<br>thyroiditis | Absent    | 185 (47.9)                                                 | 77 (19.9)                          | 124 (32.1)                        | 386        | 0.484  | 110 (53.4)                                                         | 44 (21.4)                          | 52 (25.2)                         | 206        | 0.525 |
|                            | Present   | 123 (43.6)                                                 | 57 (20.2)                          | 102 (36.2)                        | 282        |        | 80 (48.2)                                                          | 36 (21.7)                          | 50 (30.1)                         | 166        |       |
| Primary tumor<br>diameter  | ≤10 mm    | 190 (51.1)                                                 | 80 (21.5)                          | 102 (27.4)                        | 372        | <0.001 | 190 (51.1)                                                         | 80 (21.5)                          | 102 (27.4)                        | 372        | *     |
|                            | >10 mm    | 118 (39.9)                                                 | 54 (18.2)                          | 124 (41.9)                        | 296        |        |                                                                    |                                    |                                   |            |       |
| Histological<br>subtype    | CPTC      | 145 (44.1)                                                 | 65 (19.8)                          | 119 (36.2)                        | 329        | 0.102  | 99 (50.8)                                                          | 43 (22.1)                          | 53 (27.2)                         | 195        | 0.958 |
|                            | IFPTC     | 156 (49.5)                                                 | 65 (20.6)                          | 94 (29.8)                         | 315        |        | 87 (51.5)                                                          | 36 (21.3)                          | 46 (27.2)                         | 169        |       |
|                            | ASPTC     | 7 (29.2)                                                   | 4 (16.7)                           | 13 (54.2)                         | 24         |        | 4 (50.0)                                                           | 1 (12.5)                           | 3 (37.5)                          | 8          |       |
| LVI                        | Absent    | 279 (46.4)                                                 | 124 (20.6)                         | 198 (32.9)                        | 601        | 0.286  | 187 (52.1)                                                         | 76 (21.2)                          | 96 (26.7)                         | 359        | 0.115 |
|                            | Present   | 29 (46.1)                                                  | 10 (14.9)                          | 28 (41.8)                         | 67         |        | 3 (23.1)                                                           | 4 (30.8)                           | 6 (46.2)                          | 13         |       |
| PNI                        | Absent    | 301 (46.0)                                                 | 131 (20.0)                         | 223 (34.0)                        | 655        | 0.710  | 189 (51.2)                                                         | 78 (21.1)                          | 102 (27.6)                        | 369        | 0.143 |
|                            | Present   | 7 (53.8)                                                   | 3 (23.1)                           | 3 (23.1)                          | 13         |        | 1 (33.3)                                                           | 2 (66.7)                           | 0 (0.0)                           | 3          |       |
| LNМ                        | Absent    | 159 (45.4)                                                 | 64 (18.3)                          | 127 (36.3)                        | 350        | 0.659  | 110 (52.4)                                                         | 39 (18.6)                          | 61 (29.0)                         | 210        | 0.177 |
|                            | Present   | 26 (39.4)                                                  | 13 (19.7)                          | 27 (40.9)                         | 66         |        | 9 (34.6)                                                           | 8 (30.8)                           | 9 (34.6)                          | 26         |       |
| ETE                        | Absent    | 245 (46.4)                                                 | 107 (20.3)                         | 176 (33.3)                        | 528        | 0.867  | 172 (53.3)                                                         | 67 (20.7)                          | 84 (26.0)                         | 323        | 0.093 |
|                            | Present   | 63 (45.0)                                                  | 27 (19.3)                          | 50 (35.7)                         | 140        |        | 18 (36.7)                                                          | 13 (26.5)                          | 18 (36.7)                         | 49         |       |

|                                   |                  |            |            |            |     |                  |            |           |            |     |              |
|-----------------------------------|------------------|------------|------------|------------|-----|------------------|------------|-----------|------------|-----|--------------|
| <b>Radioactive iodine therapy</b> | <b>Absent</b>    | 164 (56.2) | 54 (18.5)  | 74 (25.3)  | 292 | <b>&lt;0.001</b> | 160 (56.1) | 53 (18.6) | 72 (25.3)  | 285 | <b>0.002</b> |
|                                   | <b>Present</b>   | 144 (38.3) | 80 (21.3)  | 152 (40.4) | 376 |                  | 30 (34.5)  | 27 (31.0) | 30 (34.5)  | 87  |              |
| <b>Recurrence</b>                 | <b>Absent</b>    | 304 (46.6) | 133 (20.4) | 216 (33.1) | 684 | <b>0.018</b>     | 216 (58.5) | 83 (22.5) | 100 (27.0) | 369 | 0.812        |
|                                   | <b>Present</b>   | 7 (31.8)   | 3 (13.6)   | 12 (54.6)  | 22  |                  | 3 (42.8)   | 2 (28.6)  | 2 (28.6)   | 7   |              |
| <b>BRAFV600E</b>                  | <b>Wild-type</b> | 148 (43.3) | 71 (20.8)  | 123 (36.0) | 342 | 0.574            | 101 (50.5) | 41 (20.5) | 58 (29.0)  | 200 | 0.904        |
|                                   | <b>Mutated</b>   | 45 (49.5)  | 17 (18.7)  | 29 (31.9)  | 91  |                  | 21 (53.8)  | 8 (20.5)  | 10 (25.6)  | 39  |              |

**CPTC:** : Classic papillary thyroid carcinoma, **IFPTC:** Infiltrative follicular subtype papillary thyroid carcinoma, **ASPTC:** Aggressive subtype papillary thyroid carcinoma., **TTD:** Total tumor diameter, **LVI:** Lymphovascular invasion, **PNI:** Perineural invasion, **LNM:** Lymph node metastasis, **ETE:** Extrathyroidal extension.
